# Supplementary material
Source: Springer Nature journal article supplement (https://www.springermedizin.de/resource/supplementary/12885_2012_3799_MOESM1_ESM.pdf/9464478)
Supplement: MOESM1 [file 9464478]

**Supplementary Table 1 – Clinicopathological features of the 201 patients.**

| <b>Case</b> | <b>Sex</b> | <b>Age at diagnosis</b> | <b>Location of the primary tumor</b> | <b>Anti-EGFR therapy</b> |
|-------------|------------|-------------------------|--------------------------------------|--------------------------|
| 1           | Male       | 28                      | Transverse colon                     | Yes                      |
| 2           | Female     | 33                      | Left colon                           | No                       |
| 3           | Female     | 35                      | Sigmoid colon                        | Yes                      |
| 4           | Female     | 35                      | Rectum                               | No                       |
| 5           | Male       | 36                      | Rectum                               | Yes                      |
| 6           | Female     | 37                      | Sigmoid colon                        | No                       |
| 7           | Male       | 39                      | Transverse colon                     | Yes                      |
| 8           | Male       | 41                      | Rectum                               | Yes                      |
| 9           | Female     | 41                      | Rectum                               | No                       |
| 10          | Male       | 43                      | Sigmoid colon                        | No                       |
| 11          | Male       | 44                      | Sigmoid colon                        | No                       |
| 12          | Female     | 45                      | Rectum                               | Yes                      |
| 13          | Female     | 46                      | Left colon                           | Yes                      |
| 14          | Female     | 47                      | Sigmoid colon                        | Yes                      |
| 15          | Male       | 47                      | Right colon                          | No                       |
| 16          | Female     | 48                      | Left colon                           | No                       |
| 17          | Female     | 49                      | Rectum                               | Yes                      |
| 18          | Female     | 49                      | Rectum                               | Yes                      |
| 19          | Male       | 49                      | Rectum                               | No                       |
| 20          | Male       | 50                      | Rectum                               | Yes                      |
| 21          | Female     | 50                      | Rectum                               | Yes                      |
| 22          | Female     | 50                      | Rectum                               | No                       |
| 23          | Male       | 50                      | Sigmoid colon                        | No                       |
| 24          | Female     | 50                      | Rectum                               | Yes                      |
| 25          | Male       | 50                      | Sigmoid colon                        | Yes                      |
| 26          | Female     | 50                      | Rectum                               | No                       |
| 27          | Male       | 50                      | Left colon                           | No                       |
| 28          | Male       | 50                      | Left colon                           | Yes                      |

|    |        |    |               |     |
|----|--------|----|---------------|-----|
| 29 | Male   | 50 | Left colon    | Yes |
| 30 | Female | 51 | Rectum        | No  |
| 31 | Male   | 51 | Right colon   | Yes |
| 32 | Male   | 52 | Sigmoid colon | No  |
| 33 | Male   | 52 | Rectum        | Yes |
| 34 | Male   | 52 | Rectum        | No  |
| 35 | Male   | 53 | Rectum        | No  |
| 36 | Female | 53 | Sigmoid colon | Yes |
| 37 | Male   | 53 | Left colon    | Yes |
| 38 | Male   | 54 | Rectum        | Yes |
| 39 | Male   | 54 | Left colon    | Yes |
| 40 | Female | 54 | Left colon    | No  |
| 41 | Male   | 55 | Sigmoid colon | Yes |
| 42 | Female | 55 | Sigmoid colon | No  |
| 43 | Female | 55 | Sigmoid colon | No  |
| 44 | Female | 55 | Rectum        | Yes |
| 45 | Female | 55 | Left colon    | Yes |
| 46 | Male   | 55 | Left colon    | Yes |
| 47 | Female | 56 | Sigmoid colon | No  |
| 48 | Male   | 56 | Sigmoid colon | Yes |
| 49 | Male   | 56 | Rectum        | Yes |
| 50 | Female | 56 | Right colon   | No  |
| 51 | Female | 57 | Rectum        | Yes |
| 52 | Male   | 57 | Rectum        | Yes |
| 53 | Male   | 57 | Rectum        | Yes |
| 54 | Male   | 57 | Sigmoid colon | Yes |
| 55 | Male   | 57 | Sigmoid colon | Yes |
| 56 | Male   | 57 | Rectum        | No  |
| 57 | Male   | 57 | Rectum        | Yes |
| 58 | Male   | 57 | Right colon   | Yes |
| 59 | Female | 58 | Rectum        | No  |

|    |        |    |                  |     |
|----|--------|----|------------------|-----|
| 60 | Male   | 58 | Sigmoid colon    | Yes |
| 61 | Male   | 58 | Rectum           | Yes |
| 62 | Male   | 58 | Rectum           | No  |
| 63 | Male   | 58 | Rectum           | Yes |
| 64 | Male   | 58 | Right colon      | No  |
| 65 | Female | 58 | Left colon       | No  |
| 66 | Male   | 59 | Sigmoid colon    | Yes |
| 67 | Male   | 59 | Rectum           | No  |
| 68 | Male   | 59 | Sigmoid colon    | No  |
| 69 | Male   | 59 | Rectum           | Yes |
| 70 | Female | 59 | Right colon      | Yes |
| 71 | Male   | 59 | Right colon      | No  |
| 72 | Male   | 59 | Transverse colon | No  |
| 73 | Male   | 60 | Rectum           | Yes |
| 74 | Male   | 60 | Sigmoid colon    | Yes |
| 75 | Male   | 60 | Sigmoid colon    | No  |
| 76 | Male   | 60 | Transverse colon | Yes |
| 77 | Male   | 60 | Transverse colon | Yes |
| 78 | Male   | 61 | Rectum           | Yes |
| 79 | Male   | 61 | Sigmoid colon    | Yes |
| 80 | Female | 61 | Rectum           | Yes |
| 81 | Male   | 61 | Rectum           | No  |
| 82 | Female | 61 | Left colon       | Yes |
| 83 | Male   | 62 | Sigmoid colon    | No  |
| 84 | Female | 62 | Sigmoid colon    | Yes |
| 85 | Male   | 62 | Rectum           | Yes |
| 86 | Male   | 62 | Sigmoid colon    | Yes |
| 87 | Male   | 62 | Rectum           | Yes |
| 88 | Male   | 62 | Rectum           | Yes |
| 89 | Male   | 63 | Sigmoid colon    | No  |
| 90 | Female | 63 | Sigmoid colon    | Yes |

|     |        |    |                  |     |
|-----|--------|----|------------------|-----|
| 91  | Female | 63 | Sigmoid colon    | Yes |
| 92  | Female | 63 | Rectum           | Yes |
| 93  | Male   | 63 | Transverse colon | Yes |
| 94  | Male   | 63 | Left colon       | No  |
| 95  | Male   | 64 | Sigmoid colon    | No  |
| 96  | Male   | 64 | Sigmoid colon    | Yes |
| 97  | Male   | 64 | Rectum           | No  |
| 98  | Female | 64 | Rectum           | Yes |
| 99  | Male   | 64 | Rectum           | Yes |
| 100 | Male   | 64 | Rectum           | No  |
| 101 | Male   | 64 | Right colon      | Yes |
| 102 | Male   | 65 | Rectum           | No  |
| 103 | Male   | 65 | Sigmoid colon    | Yes |
| 104 | Female | 65 | Rectum           | Yes |
| 105 | Male   | 65 | Rectum           | Yes |
| 106 | Female | 65 | Rectum           | Yes |
| 107 | Male   | 65 | Right colon      | No  |
| 108 | Male   | 65 | Right colon      | No  |
| 109 | Female | 65 | Left colon       | No  |
| 110 | Male   | 66 | Rectum           | No  |
| 111 | Male   | 66 | Left colon       | Yes |
| 112 | Male   | 66 | Left colon       | Yes |
| 113 | Male   | 67 | Rectum           | Yes |
| 114 | Male   | 67 | Rectum           | Yes |
| 115 | Male   | 67 | Rectum           | No  |
| 116 | Female | 69 | Sigmoid colon    | Yes |
| 117 | Male   | 69 | Sigmoid colon    | Yes |
| 118 | Male   | 69 | Rectum           | Yes |
| 119 | Male   | 69 | Transverse colon | Yes |
| 120 | Male   | 70 | Rectum           | Yes |
| 121 | Female | 70 | Rectum           | Yes |

|     |        |    |               |     |
|-----|--------|----|---------------|-----|
| 122 | Female | 72 | Rectum        | No  |
| 123 | Female | 73 | Sigmoid colon | No  |
| 124 | Female | 74 | Sigmoid colon | No  |
| 125 | Male   | 76 | Sigmoid colon | No  |
| 126 | Male   | 56 | Rectum        | No  |
| 127 | Female | 83 | Colon         | No  |
| 128 | Female | 63 | Rectum        | No  |
| 129 | Male   | 55 | Left colon    | Yes |
| 130 | Male   | 71 | Sigmoid colon | No  |
| 131 | Male   | 77 | Left colon    | No  |
| 132 | Male   | 59 | Rectum        | No  |
| 133 | Male   | 64 | Sigmoid colon | No  |
| 134 | Male   | 63 | Rectum        | Yes |
| 135 | Male   | 80 | Colon         | No  |
| 136 | Male   | 39 | Rectum        | No  |
| 137 | Male   | 40 | Sigmoid colon | No  |
| 138 | Male   | 58 | Rectum        | No  |
| 139 | Male   | 58 | Right colon   | No  |
| 140 | Male   | 83 | Sigmoid colon | No  |
| 141 | Female | 59 | Right colon   | No  |
| 142 | Male   | 63 | Rectum        | No  |
| 143 | Male   | 84 | Colon         | No  |
| 144 | Male   | 69 | Sigmoid colon | No  |
| 145 | Male   | 59 | Colon         | Yes |
| 146 | Male   | 68 | Colon         | No  |
| 147 | Male   | 57 | Sigmoid colon | No  |
| 148 | Female | 55 | Sigmoid colon | No  |
| 149 | Male   | 67 | Rectum        | Yes |
| 150 | Female | 78 | Sigmoid colon | Yes |
| 151 | Male   | 82 | Sigmoid colon | No  |
| 152 | Male   | 70 | Sigmoid colon | No  |

|     |        |    |                       |     |
|-----|--------|----|-----------------------|-----|
| 153 | Male   | 51 | Sigmoid colon         | No  |
| 154 | Male   | 77 | Sigmoid colon         | Yes |
| 155 | Male   | 80 | Right colon           | Yes |
| 156 | Male   | 71 | Rectum                | No  |
| 157 | Female | 64 | Rectum                | No  |
| 158 | Male   | 39 | Sigmoid colon         | No  |
| 159 | Male   | 64 | Rectum                | Yes |
| 160 | Male   | 65 | Sigmoid colon         | Yes |
| 161 | Male   | 79 | Right colon           | No  |
| 162 | Male   | 60 | Sigmoid colon         | No  |
| 163 | Male   | 58 | Rectosigmoid junction | No  |
| 164 | Male   | 71 | Rectum                | No  |
| 165 | Female | 79 | Cecum                 | No  |
| 166 | Male   | 58 | Cecum                 | Yes |
| 167 | Female | 64 | Right colon           | No  |
| 168 | Male   | 84 | Rectum                | No  |
| 169 | Female | 71 | Sigmoid colon         | No  |
| 170 | Female | 71 | Transverse colon      | No  |
| 171 | Female | 45 | Sigmoid colon         | Yes |
| 172 | Female | 79 | Rectum                | No  |
| 173 | Male   | 75 | Right colon           | Yes |
| 174 | Female | 73 | Rectum                | No  |
| 175 | Female | 48 | Sigmoid colon         | Yes |
| 176 | Male   | 77 | Sigmoid colon         | No  |
| 177 | Male   | 71 | Sigmoid colon         | No  |
| 178 | Male   | 89 | Right colon           | No  |
| 179 | Male   | 68 | Sigmoid colon         | No  |
| 180 | Male   | 78 | Rectum                | No  |
| 181 | Male   | 54 | Sigmoid colon         | No  |
| 182 | Male   | 72 | Sigmoid colon         | No  |
| 183 | Male   | 68 | Left colon            | No  |

|     |        |    |                  |     |
|-----|--------|----|------------------|-----|
| 184 | Male   | 49 | Rectum           | Yes |
| 185 | Male   | 70 | Sigmoid colon    | No  |
| 186 | Male   | 45 | Rectum           | No  |
| 187 | Male   | 48 | Transverse colon | Yes |
| 188 | Female | 68 | Left colon       | No  |
| 189 | Male   | 72 | Left colon       | No  |
| 190 | Female | 65 | Right colon      | No  |
| 191 | Male   | 62 | Right colon      | Yes |
| 192 | Male   | 74 | Rectum           | No  |
| 193 | Male   | 53 | Rectum           | No  |
| 194 | Female | 66 | Sigmoid colon    | No  |
| 195 | Male   | 68 | Rectum           | Yes |
| 196 | Male   | 60 | Rectum           | No  |
| 197 | Male   | 68 | Transverse colon | No  |
| 198 | Male   | 65 | Sigmoid colon    | No  |
| 199 | Female | 64 | Transverse colon | Yes |
| 200 | Female | 79 | Sigmoid colon    | No  |
| 201 | Male   | 75 | Rectum           | Yes |
